1 Cycloheximide-Producing *Streptomyces* Associated with *Xyleborinus saxesenii* and *Xyleborus*  
2 *affinis* Fungus-Farming Ambrosia Beetles

3

4 Short title: Ambrosia Beetle Actinobacteria Associations

5

6 Kirk J. Grubbs<sup>1,#a</sup>, Frank Surup<sup>2,#b</sup>, Peter H. W. Biedermann<sup>3</sup>, Bradon R. McDonald<sup>4</sup>, Jonathan  
7 Klassen<sup>4,#c</sup>, Caitlin M. Carlson<sup>4</sup>, Jon Clardy<sup>2\*</sup> and Cameron R. Currie<sup>4\*</sup>

8

9 <sup>1</sup>Department of Cellular and Molecular Pathology, University of Wisconsin-Madison, Madison,  
10 WI, USA

11 <sup>2</sup>Department of Biological Chemistry and Molecular Pharmacology, Harvard Medical School,  
12 Boston, MA, USA

13 <sup>3</sup>Research Group Insect-Fungus Symbiosis, Department for Animal Ecology and Tropical  
14 Biology, University of Wuerzburg, Germany

15 <sup>4</sup>Department of Bacteriology, University of Wisconsin-Madison, Madison, WI, USA

16

17 <sup>#a</sup>Current address: Computational Life Sciences, Bayer Trait Discovery, Morrisville, NC, USA.

18 <sup>#b</sup>Current address: Helmholtz Centre for Infection Research GmbH, Department Microbial  
19 Drugs, Braunschweig, Germany.

20 <sup>#c</sup>Current address: Department of Molecular and Cell Biology, University of Connecticut, Storrs,  
21 CT, USA

22

23 \* Corresponding authors: E-mail: [currie@wisc.edu](mailto:currie@wisc.edu); [jon\\_clardy@hms.harvard.edu](mailto:jon_clardy@hms.harvard.edu).

24

25 **Abstract**

26 Symbiotic microbes help a myriad of insects acquire nutrients. Recent work suggests that insects  
27 also frequently associate with actinobacterial symbionts that produce molecules to help defend  
28 against parasites and predators. Here we explore a potential association between Actinobacteria  
29 and two species of fungus-farming ambrosia beetles, *Xyleborinus saxesenii* and *Xyleborus*  
30 *affinis*. We isolated and identified actinobacterial and fungal symbionts from laboratory reared  
31 nests, and characterized small molecules produced by the putative actinobacterial symbionts.  
32 One 16S rRNA phylotype of *Streptomyces* (XylebKG-1) was abundantly and consistently  
33 isolated from the nests and adults of *X. saxesenii* and *X. affinis* nests. In addition to *Raffaelea*  
34 *sulphurea*, the symbiont that *X. saxesenii* cultivates, we also repeatedly isolated a strain of  
35 *Nectria* sp. that is an antagonist of this mutualism. Inhibition bioassays between *S. griseus*  
36 XylebKG-1 and the fungal symbionts from *X. saxesenii* revealed strong inhibitory activity of the  
37 actinobacterium towards the fungal antagonist *Nectria* sp. but not the fungal mutualist *R.*  
38 *sulphurea*. Bioassay guided HPLC fractionation of *S. griseus* XylebKG-1 culture extracts,  
39 followed by NMR and mass spectrometry identified cycloheximide as the compound responsible  
40 for the observed growth inhibition. A biosynthetic gene cluster putatively encoding  
41 cycloheximide was also identified in *S. griseus* XylebKG-1. The consistent isolation of a single  
42 16S phylotype of *Streptomyces* from two species of ambrosia beetles, and our finding that a  
43 representative isolate of this phylotype produces cycloheximide, which inhibits a parasite of the  
44 system but not the cultivated fungus, suggests that these actinobacteria may play defensive roles  
45 within these systems.

## 46 **Introduction**

47 Ambrosia beetles are a diverse group of insects (~3,400 species) that cultivate fungi for food [1,  
48 2]. Adult beetles generally bore into dead or dying trees, establishing a nest in the xylem. They  
49 actively inoculate the tunnel walls of the nest with spores of their mutualistic fungus, which  
50 grows and forms a layer of nutrient rich aleurioconidia (“ambrosial growth” [3]) on the woody  
51 tissue of the host plant and serves as the sole source of nutrition for adults and developing beetle  
52 larvae. Ambrosia beetles vector their fungal mutualist in specialized structures called mycangia  
53 or mycetangia [4, 5]. Nutritional symbioses with fungi evolved at least eleven times  
54 independently in bark- and ambrosia beetles (*Scolytinae* and *Platypodinae*: Coleoptera) [1, 6].  
55 Specific ambrosia beetle species associate with specific ambrosia fungi [3, 7-9], although some  
56 beetles appear to rely on a community of cultivars. Fungal cultivars from the scolytine weevil  
57 genera *Xyleborus* and *Xyleborinus* are mostly in the Ascomycota genera *Ambrosiella*  
58 (*Ceratocystidaceae*: Microascales) and *Raffaelea* (*Ophiostomataceae*: Ophiostomatales), which  
59 convergently evolved as beetle cultivars 30-60 million years ago [10]. Whereas many phloem-  
60 boring bark beetles gain extra nutrition by associations with their cultivar fungi (e.g.  
61 *Dendroctonus* sp.), those xylem-boring ambrosia beetles that we studied are true fungus-farmers  
62 and obligately rely on their cultivars for food [9, 11]. *Nectria*, *Penicillium* and *Aspergillus*  
63 species are common associates of these beetles, but are typically found at low abundances within  
64 nests. They are regarded competitors, parasites or pathogens of the ambrosia beetle mutualism  
65 [3, 9].

66

67 In addition to ambrosia beetles, active farming of fungi also occurs in attine ants and  
68 macrotermite termites [12-14], and nutritional symbioses with fungi are widespread in insects

69 [15-21]. Reliance on fungi by these insects exposes them to potential parasite pressure in the  
70 form of pathogens or competitors of their symbionts. For example, the fungal mutualist of attine  
71 ants is impacted by a specialized and potentially virulent fungal parasite [22, 23]. To help defend  
72 the cultivar from this parasite the ants use actinobacterial symbionts that produce antibiotics [23-  
73 26]. A similar type of defensive symbiosis has been shown in the fungus-associated bark beetle  
74 *Dendroctonus frontalis* [27], and has been further suggested in the Mediterranean Pine Engraver  
75 bark beetle, *Orthotomicus erosus* [28], as well as fungus-growing termites [29]. Beyond  
76 defending fungal mutualists in agricultural associations, Actinobacteria are well adapted for  
77 insect dispersal (e.g. by desiccation-resistant, hydrophobic spores that stick to the surface of  
78 insects [30]) and fulfill different defensive capacities in other insect systems. Within antennal  
79 glands, Beewolves (*Philanthus* spp.) cultivate Actinobacteria that they transfer into brood cells  
80 and onto developing cocoons in order to prevent infection by a wide range of pathogens [31].  
81 Actinobacteria and the antibiotic secondary metabolites they produce have been identified in  
82 several species of mud daubers [32, 33]. Furthermore, Actinobacteria have been isolated from  
83 several additional ant species [34-36] and the gypsy moth [34].

84

85 The majority of insect defensive symbioses characterized have involved Actinobacteria, which is  
86 not surprising as Actinobacteria, especially *Streptomyces*, are well known producers of bioactive  
87 secondary metabolites [37]. Over 10,000 biologically active compounds have been identified  
88 from Actinobacteria, accounting for ~45% of known microbial metabolites [38]. The phylum  
89 Actinobacteria is composed of Gram-positive bacteria and is one of the largest in the domain  
90 Bacteria. They are common soil microbes, and recent studies have also identified them as

91 dominant community members in both freshwater [39] and marine [40] habitats. As such,  
92 Actinobacteria are common microbiome constituents in many environments.

93

94 The fruit-tree pinhole borer *Xyleborinus saxesenii* Ratzeburg and the sugarcane shot-hole borer  
95 *Xyleborus affinis* Eichhoff colonize a wide variety of dying or recently dead tree species and are  
96 two of the most widespread ambrosia beetles worldwide [41, 42]. Both species are facultatively  
97 eusocial depending on the viability of the wood resource and may settle the same nest for  
98 multiple generations: Adult offspring of a single, sib-mated foundress typically delay dispersal  
99 from their mothers' tunnel system and help her with nest-hygiene, brood-care and fungus-  
100 farming [43-45]. Unique for Holometabola, ambrosia-beetle larvae also help in these cooperative  
101 tasks [46]. The beetles' activity and presence is necessary to maintain the fruiting and  
102 monocultures of their fungal cultivars [2, 3]. Both species are obligately dependent on *Raffaelea*  
103 ambrosia fungi [9, 47]. Experiments in *X. saxesenii* showed that these cultures are protected  
104 against pathogenic fungi, such as *Paecilomyces variottii* and *Fusarium merismoides*, by larvae  
105 and adults in unknown ways [46] and it is possible that this defence involves "microbial  
106 helpers".

107

108 Here we describe actinobacterial symbionts of *X. saxesenii* and *X. affinis* ambrosia beetles and  
109 explore their potential function in helping defend nests against an antagonistic fungus that was  
110 isolated from *X. saxesenii*. Using specific media, we isolated both Actinobacteria and fungi from  
111 laboratory reared nests. Actinobacterial isolates were characterized using 16S rRNA gene  
112 sequencing and tested for their ability to inhibit the growth of both mutualistic and parasitic  
113 fungal isolates from the same nests. Active compounds were isolated using bioassay-guided

114 HPLC fractionation, chemically characterized using NMR spectroscopy and mass spectrometry,  
115 and further tested using bioassays to confirm growth inhibition activity. We sequenced the  
116 genome of one actinobacterial isolate [48] to confirm this strains' phylogenetic identification, and  
117 identified a putative biosynthetic gene cluster for one of the characterized active compounds.  
118 Based on these results, we propose a mutualism between two species of ambrosia beetle and  
119 Actinobacteria, in which the bacterial symbiont produces cycloheximide to inhibit the growth of  
120 fungal competitors of the mutualistic cultivar fungus.

121

## 122 **Materials and Methods**

123 **Beetle collection and rearing.** *Xyleborus affinis* and *Xyleborinus saxesenii* females (N > 20  
124 each) were collected at the Southern Research Station in Pineville, LA (31°20' N, 92°24' W; 123  
125 ft asl) with four ethanol (95%) baited Lindgren funnel traps in October 2007. Live beetles were  
126 placed in sterile plastic tubes with wet filter paper, stored at 4 °C for up to three days, surface  
127 sterilized by immersing in 70% ethanol and deionized water for a few seconds, and then reared  
128 on artificial medium in glass tubes following Biedermann *et al* [44, 49]. Briefly, beetles were  
129 reared in sterile glass tubes (Bellco culture tubes 18 × 150 mm) filled with the standard medium  
130 for rearing xyleborine ambrosia beetles. A single female per glass tube was put onto the medium  
131 and usually started boring tunnels as if in wood (N = 20 tubes/species). About one third of these  
132 beetle colonies successfully established brood and these were maintained in the lab at room  
133 temperature with indirect sunlight.

134

135 **Isolation of Actinobacteria.** We conducted targeted isolation of Actinobacteria from each of  
136 three *X. saxesenii* and *X. affinis* colonies in triplicate, aseptically sampling each tube three times

137 in a biosafety cabinet. Briefly, the nest inside the solid rearing substrate was shaken out of the  
138 tube and tunnel-wall material containing the layer of the mutualistic fungus (henceforth termed  
139 nest material), as well as individuals were collected with sterile metal probes / tweezers from the  
140 exposed tunnels. *X. saxesenii* nest material (0.05 g per sample), adults (2 pooled individuals per  
141 sample), and larvae (5 pooled individuals per sample) were sampled; only nest material (0.05 g  
142 per sample) and adults (2 pooled individuals per sample) were sampled from *X. affinis*. All  
143 samples were chosen at random and homogenized in 500  $\mu$ L of autoclaved, 0.22  $\mu$ m filtered,  
144 deionized water; 100  $\mu$ L of each was evenly spread on dried chitin agar plates (15 g agar, 3 g  
145 chitin, 0.575 g  $K_2HPO_4$ , 0.375 g  $MgSO_4 \times 7H_2O$ , 0.275 g  $KH_2PO_4$ , 0.0075 g  $FeSO_4 \times 7H_2O$ ,  
146 0.00075 g  $MnCl_2 \times 4H_2O$ , and 0.00075 g  $ZnSO_4 \times 7H_2O$  dissolved in 750 mL deionized water)  
147 in duplicate and allowed to dry before wrapping with parafilm. Plates were incubated at 30 °C  
148 for three weeks, after which colony forming units (CFUs) were counted and eight of each  
149 morphotype per plate were transferred to yeast malt extract agar (YMEA: 4 g yeast extract, 10 g  
150 malt extract, 4 g dextrose, and 15 g agar dissolved in 1 L). Colonies on YMEA plates were  
151 allowed to grow at 30 °C for two weeks, visually inspected for morphological properties  
152 characteristic of Actinobacteria, and sub-cultured as necessary to obtain pure cultures. Three  
153 0.05 g samples of artificial medium from tubes that were not inoculated with beetles were also  
154 plated in duplicate on YMEA without antibiotics to screen for contamination and possible  
155 presence of Actinobacteria in the beetle medium. All media used for actinobacterial isolation had  
156 filter-sterilized cycloheximide (0.05 g/L) and nystatin (10,000 units/mL) added after autoclaving  
157 and cooling to suppress fungal growth.

158

159 **Fungal isolations.** Fungal symbionts were isolated from three *X. saxesenii* nests, sampled three  
160 times each. *X. affinis* were not sampled for fungi. Nest material was scraped using a sterile metal  
161 probe and inoculated on potato dextrose agar plates (PDA; Difco, Sparks, MD) with penicillin  
162 (0.05 g/L) and streptomycin (0.05 g/L) added after autoclaving and cooling to suppress bacterial  
163 growth, and incubated at 30 °C for one week. During incubation, fast growing fungi were sub-  
164 cultured onto fresh PDA plates and the agar on which they grew was fully removed to prevent  
165 overgrowth of the entire original isolation plate. Two different fungi were obtained in pure  
166 culture by successive rounds of scraping a small amount of material from the edge of each  
167 colony and then plating on individual PDA plates.

168

169 **DNA sequencing.** The 16S rRNA gene was sequenced from eight Actinobacteria isolates  
170 obtained from both *X. saxesenii* and *X. affinis* for a total of 16. In an effort to maximize the  
171 possibility of capturing any phylogenetic diversity, and thereby discover if multiple species were  
172 present, the strains that were sequenced were chosen based on morphological differences rather  
173 than origin. Only two morphologies were observed with the only differences being that the  
174 spores of one morphology were slightly darker than the other. The 16S rRNA gene PCR primers  
175 used were the Actinobacteria-specific F243 (5'-GGATGAGCCCGCGGCCTA-3') and R1378 (5'-  
176 CGGTGTGTACAAGGCCCGGGAACG-3') [53], and in separate reactions the general bacterial  
177 primers pA (5'-AGAGTTTGATCCTGGCTCAG-3') and pH (5'-  
178 AAGGAGGTGATCCAGCCCGCA-3') to increase coverage length [54]. The cycle parameters  
179 used for each primer set was similar to those above except the annealing temperatures were 58  
180 °C and 54 °C, respectively, and the elongation time was 95 s for primers pA and pH. Each PCR  
181 reaction was composed of 12.5 µl GoTaq (Promega), 1 µl of template DNA, and 40 µM of each



182 primer in a final volume of 25  $\mu$ l. The EF- $\alpha$  and 18S rRNA genes were sequenced for two each  
183 of the isolated *Raffaelea sulphurea* and the putative antagonistic fungus *Nectria* spp. DNA was  
184 extracted as previously described [50]. PCR primers NS1 (5'-GTAGTCATATGCTTGTCTC-3')  
185 and NS4 (5'-CTTCCGTCAATTCCTTTAAG-3') were used to amplify the 18S rRNA gene [51],  
186 using thermocycling parameters: 95 °C for 2 min, 35 cycles of 95 °C for 45 s, 42 °C for 45 s, 72  
187 °C for 90 s, 72 °C for 5 min and hold at 4°C. EF- $\alpha$  gene PCR primers 983F (5'-  
188 GCYCCYGGHCAYCGTGAYTTYAT) and 2218R (5'-ATGACACCRACRGCACRGTGTG)  
189 [52] were used with similar cycling parameters, except annealing temperature and elongation  
190 time were 55 °C and 130 s.

191

192 PCR amplicons were purified by adding 0.8  $\mu$ l ExoSap-IT (USB) to 2  $\mu$ l of PCR product diluted  
193 in 5.25  $\mu$ l of autoclaved deionized water and incubating this mixture at 37 °C for 15 min and  
194 then at 80 °C for 15 min. Sanger sequencing reactions contained: 1  $\mu$ l BigDye Terminator v. 3.1  
195 (Applied Biosystems), 1.5  $\mu$ l Big Dye Buffer (Applied Biosystems) and 1  $\mu$ l of 10  $\mu$ M primer,  
196 and the entire cleaned amplicon solution. Sequencing PCR conditions were 95 °C for 3 min, 35  
197 cycles of 95 °C for 20 s, 45 °C for 30, 60 °C for 4min, 72 °C for 7 min and hold at 4°C. Excess  
198 dye terminators were removed using CleanSeq beads (Agencourt Biosciences) and samples were  
199 resuspended in 40  $\mu$ l of sterile ddH<sub>2</sub>O and sequenced at the University of Wisconsin-Madison  
200 Biotechnology Center using an ABI 377 instrument (Applied Biosystems).

201

202 **Actinobacteria antifungal bioassays.** Growth inhibition assays were conducted between one *S.*  
203 *griseus* XylebKG-1 like strain (see results) isolated from each of the three *X. saxesenii* nests and  
204 both isolated fungal species by first inoculating the Actinobacterium in the center of a PDA plate

205 and allowing it to grow for two weeks. A small amount of test fungus was then inoculated at the  
206 edge of this Petri plate and grown at 30 °C for two weeks, after which a zone of inhibition (ZOI)  
207 was determined by measuring the shortest distance between the bacterium and the fungus.

208

209 **Phylogenetic analyses.** All sequences were assembled using Bionumerics v6.5 (Applied Maths),  
210 searched against the GenBank Nucleotide Sequence Database [55] using BLAST [56] to  
211 determine a preliminary identity, and then aligned in MEGA5 [57] using MUSCLE [58]. 18S  
212 rRNA and EF- $\alpha$  sequences were aligned and trimmed individually and subsequently  
213 concatenated to increase phylogenetic resolving power. To ensure codons were not split by gaps,  
214 alignments were inspected in MEGA5 for consistent reading frames. Substitution models were  
215 chosen using the model selection module of MEGA5. Maximum likelihood phylogenies were  
216 inferred using 500 bootstrap replicates using MEGA5.

217

218 **Genome Based Phylogeny.** The genome of *S. griseus* XylebKG-1 has previously been  
219 sequenced [48] allowing us to generate a genome based phylogeny for this isolate. Proteins from  
220 all complete *Streptomyces* genomes were predicted using prodigal [59] for consistency and  
221 annotated using HMMer [60] models generated from KEGG [61] gene families, of which 1,364  
222 KEGG gene families were conserved in all genomes. For these gene families, the proteins with  
223 the highest HMMer bitscore from each genome were aligned using MAFFT [62] and then  
224 converted to a nucleotide alignment. These alignments were concatenated and a phylogeny  
225 generated using RAxML [63] with 100 rapid bootstraps.

226

227 **Synteny Map.** The genomes of *Streptomyces griseus* subsp. *griseus* NBRC13350  
228 [NC\_010572.1] and *Streptomyces griseus* XylebKG-1 were aligned using progressive Mauve  
229 [64] with default parameters.

230  
231 **Analytical Chemistry Methods and Instrumentation.** One- and two-dimensional NMR spectra  
232 were acquired using a Varian Inova spectrometer with a frequency of 600 MHz for <sup>1</sup>H and 150  
233 MHz for <sup>13</sup>C nuclei. All compounds were dissolved in CD<sub>3</sub>OD. HPLC/MS analysis was  
234 performed on an Agilent 1200 Series HPLC / 6130 Series mass spectrometer. High resolution  
235 spectra were obtained on a Waters Micromass Q-TOF Ultima ESI-TOF mass spectrometer.

236  
237 **Isolation and Elucidation of Bioactive Compounds.** *S. griseus* XylebKG-1 was cultivated on  
238 PDA plates for 5-10 days. Seed biomass for 1 L cultures was produced by adding 1 cm<sup>2</sup> of a  
239 single mature PDA culture to three 500 mL Erlenmeyer flasks containing 85 mL modified yeast  
240 peptone maltose medium (YPM: 2 g/L yeast extract, 2 g/L bactopectone, 4 g/L D-mannitol).  
241 These were incubated at 28 °C with shaking at 250 rpm for 48 h. Twenty-five ml of each culture  
242 was added to eight 1 L of YPM in 4 L Erlenmeyer flasks and incubated for 72 h at 28 °C with  
243 shaking at 250 rpm. Supernatants and mycelia were processed separately after cultures were  
244 centrifuged at 7000 rpm for 30 min. Culture supernatants were adjusted to pH 6 and extracted  
245 twice with an equal volume of ethyl acetate. After evaporation *in vacuo*, residues were  
246 resuspended in 2 mL MeOH/H<sub>2</sub>O (8:2). Mycelia were lyophilized and each extracted with 50 mL  
247 acetone and 50 mL methanol. After evaporation *in vacuo*, crude extracts were resuspended in  
248 2 mL methanol. Crude supernatant and mycelium extracts were tested for inhibition of *Nectria*  
249 sp.; only the extracts of the crude supernatant showed significant assay activity. Crude

250 supernatant extracts were purified using a 2 g pre-packed C<sub>18</sub> Sep-Pak resin and fractionated by  
251 eluting with a gradient of pure water to pure methanol. The pure water flow through and 10%  
252 methanol fractions exhibited the highest anti-*Nectria* activity. These fractions were therefore  
253 combined and fractionated by gel chromatography using Sephadex LH-20 with methanol as the  
254 mobile phase (column 60 x 2.5 cm). Active fractions were combined and subsequently purified  
255 by reversed-phase HPLC (Agilent 1100 Series HPLC system, Supelco Discovery HS C18  
256 column, 250 x 10 mm, 2 mL/min). HPLC conditions used: 2 min 80% A, 20% B in 28 min to  
257 100% B (A: water, B: methanol). The fraction most active against *Nectria* sp. was eluted from  
258 17.5 and 18 min and contained 2.7 mg of cycloheximide (**1**).

259  
260 **One Strain Many Compounds (OSMAC) Screening.** *S. griseus* XylebKG-1 strain was  
261 cultivated on agar plates (300 mL) of YPM, PDA, oat media (20 g/L oat meal, 2.5 mL/L trace  
262 element solution, 3 g/L CaCl<sub>2</sub>·2 H<sub>2</sub>O, 1 g/L Fe(III)-citrate, 0.2 g/L MnSO<sub>4</sub>, 0.1 g/L ZnCl<sub>2</sub>, 25  
263 mg/L CuSO<sub>4</sub>·5 H<sub>2</sub>O, 20 mg/L Na<sub>2</sub>B<sub>4</sub>O<sub>7</sub>·10 H<sub>2</sub>O, 4 mg/L CoCl<sub>2</sub>, 10 mg/L Na<sub>2</sub>MoO<sub>4</sub>·2 H<sub>2</sub>O), soy  
264 mannitol media (20 g/L soy meal, 20 g/L mannitol), starch-glucose-glycerol media (10 g/L  
265 glucose, 10 g/L glycerol, 10 g/L starch, 2.5 mL/L cornsteep liquor, 5 g/L casein-peptone, 2 g/L  
266 yeast extract, 1 g/L NaCl, 3 g/L CaCO<sub>3</sub>), ISP1 media (5 g/L pancreatic digest of casein, yeast  
267 extract 3 g/L), ISP2 media (4 g/L yeast extract, 10 g/L malt extract, 4 g/L dextrose), 1187 media  
268 (10 g/L starch, 2 g/L (NH<sub>4</sub>)<sub>2</sub>SO<sub>4</sub>, 1 g K<sub>2</sub>HPO<sub>4</sub>, 1 g/L MgSO<sub>4</sub>·7 H<sub>2</sub>O, 1 g/L NaCl, 2 g CaCO<sub>3</sub>,  
269 5 mL/L trace element solution) for 7 days at 30 °C. All plates were extracted with ethyl acetate.  
270 Naramycin B (0.7 mg, **2**) was isolated from the crude extract of ISP1 cultivation by  
271 semipreparative HPLC (gradient 22% to 40% acetonitrile in 25 min, Supelco Discovery HS C18  
272 column, 250 x 10 mm). Actiphenol (1.6 mg, **3**) was isolated from the crude extract of 1187

273 cultivation by preparative HPLC (gradient 65% to 100% methanol in 25 min, column  
274 Phenomenex Luna C18 250x21 mm. Dihydromaltophilin (2.4 mg, **4**) was isolated from extracts  
275 of PDA and 1187 cultivations by preparative HPLC (gradient 50% to 100% acetonitrile in 25  
276 min, column Phenomenex Luna C18 250x21mm), (gradient 80% to 100% acetonitrile in 25 min,  
277 column Phenomenex Luna C18 250x21mm) and semi-preparative HPLC (gradient 35% to 50%  
278 acetonitrile in 25 min, column Supelco C18 250x8mm).

279

280 Cycloheximide (**1**): white amorphous powder; <sup>1</sup>H, <sup>13</sup>C NMR were identical to a commercial  
281 sample obtained from Sigma-Aldrich [65], ESI-MS *m/z* [M+Na]<sup>+</sup> 304.1, [M+H]<sup>+</sup> 282.1, [M-H]<sup>-</sup>  
282 280.1; HR-ESI-MS *m/z* 282.1718 [M+H]<sup>+</sup> (calculated for C<sub>15</sub>H<sub>24</sub>NO<sub>4</sub>, 282.1700).

283 Naramycin B (**2**): white amorphous powder; <sup>1</sup>H NMR data were consistent with those previously  
284 published for this metabolite [66]; ESI-MS *m/z* [M+Na]<sup>+</sup> 304.1, [M+H]<sup>+</sup> 282.1, [M-H]<sup>-</sup> 280.1.

285 Actiphenol (**3**): white amorphous powder; <sup>1</sup>H NMR data were consistent with those previously  
286 reported [67]; ESI-MS *m/z* [M+Na]<sup>+</sup> 298.0, [M+H]<sup>+</sup> 276.2, [M-H]<sup>-</sup> 274.1.

287 Dihydromaltophilin (**4**): white amorphous powder; <sup>1</sup>H NMR and <sup>13</sup>C NMR data were consistent  
288 with those previously reported [68]; ESI-MS *m/z* 513.3 [M+H]<sup>+</sup>, 511.3 [M-H]<sup>-</sup>; HR-ESI-MS  
289 513.2964 [M+H]<sup>+</sup> (calculated for C<sub>29</sub>H<sub>41</sub>N<sub>2</sub>O<sub>6</sub> 513.2965).

290

291 **Cycloheximide antifungal assays.** Minimum inhibitory concentrations were determined using  
292 *Nectria* sp. and *R. sulphurea* grown in liquid YPM for three days. Cultures were diluted 1:1000  
293 with fresh YPM and 200 μL per well transferred into 96-well plates containing various amounts  
294 of commercial cycloheximide (100 μg, 50 μg, 20 μg, 10 μg, 5 μg, 2 μg, 1 μg) and  
295 dihydromaltophilin (5 μg, 2 μg, 0.5 μg, 0.2 μg). These 96-well plates were incubated for 72h at

296 30 °C, after which the optical density was measured at 600 nm using a SpectraMax M5® Plate  
297 Reader. Naramycin B (**2**) and actiphenol (**3**) were inactive against both fungi up to  
298 concentrations of 10 µg/200 µL.

299  
300 To determine the antifungal activity of cycloheximide (**1**) and dihydromaltophilin (**4**) in an agar  
301 plate dilution assay, *Nectria* sp. and *R. sulphurea* were grown in 20 mL liquid potato dextrose  
302 media for 7 and 21 days, respectively, at 30 °C while shaking at 250 rpm. One mL of each  
303 culture was used to inoculate PDA plates. Paper disks (6 mm diameter) were soaked with  
304 solutions of 30 µL, 2 µL, 0.2 µL of **1** and 20 µL, 2 µL of **4**, both in methanol (concentration 1  
305 mg/mL), dried, and applied to the surface of the agar plates. Plates were grown at 30 °C for 5-7  
306 days, when inhibition zones were recorded.

307  
308 **Cycloheximide biosynthetic cluster identification.** The biosynthetic cluster in the high quality  
309 draft *S. griseus* XylebKG-1 genome sequence [NZ\_ADFC00000000.2] was predicted using  
310 antiSMASH v2.0 [69] and specific comparison to the previously published cycloheximide  
311 biosynthesis gene cluster from *Streptomyces* sp. YIM56141 [70]. Gene cluster functional  
312 annotations were derived from the antiSMASH output, homologous annotations in the  
313 *Streptomyces* sp. cycloheximide biosynthesis gene cluster, and retrobiosynthetic logic.

314

## 315 **Results and Discussion**

316

### 317 **Isolation and identification of Actinobacteria**

318 At least one CFU having a morphology consistent with Actinobacteria was observed from 72%  
319 of adults, 33% of larvae, and 61% of nest samples from *X. saxesenii* (Table 1). On average more  
320 Actinobacteria were cultured from nests than adults or larvae, with mean  $\pm$  SEM CFUs/sample  
321 of  $110 \pm 56$ ,  $3.4 \pm 1.4$ , and  $1.1 \pm 0.6$ , respectively (Fig. 1: Single factor ANOVA  $P = 0.0582$ ). No  
322 growth of Actinobacteria was observed from media not inoculated with beetles (Table 1, Fig. 1).  
323 Thus, the medium serving as a possible source of bacterial isolates can be eliminated. All isolates  
324 had similar morphologies and growth patterns. Isolations from *X. affinis* nests and adults also  
325 resulted in CFUs of a single actinobacterial morphotype similar to that isolated from *X.*  
326 *saxesenii*.

327

328 **Fig. 1 Number of Actinobacteria cultured from components of *X. saxesenii* nests.** Means  $\pm$ /  
329 standard errors of the mean are displayed. See methods for culture conditions.

330

331 Eight representative Actinobacteria from various samples of the *X. saxesenii* and *X. affinis*  
332 systems were identified using 16S rRNA gene sequencing. The 16S rRNA gene sequences  
333 (1,123 bp) from all 16 were 100% identical and were most similar to that of *Streptomyces*  
334 *griseus* subsp. *griseus* NBRC13350 [NC\_010572.1] when BLAST searched against the NCBI nr  
335 database, a result confirmed by phylogenetic analysis (Fig. 2, supplemental Fig. 1). A phylogeny  
336 constructed using the genome sequence for one of these strains, *S. griseus* XylebKG-1  
337 (XylebKG-1) isolated from *X. saxesenii* [NZ\_ADFC00000000.2] confirmed the close  
338 relationship between this strain and *Streptomyces griseus* subsp. *griseus* NBRC13350  
339 [NC\_010572.1], generating a tight clade in all bootstrap replicates produced (Fig. 3). This is  
340 consistent with their high genomic similarity suggested previously using average nucleotide

341 identity [48]. Note that although the progressive Mauve algorithm aligns both genomes as one  
342 homology block (except for the extreme 5' and 3' ends), this block contains some regions of  
343 negligible sequence homology. These regions typically represent secondary metabolite  
344 biosynthetic gene clusters of unknown function that are not conserved between these two  
345 genomes (data not shown).

346

347 **Fig. 2 Maximum likelihood 16S phylogeny of the XylebKG-1 clade and its relatives,**  
348 **constructed using MEGA5.** Molecular phylogeny based on 1,123 bp of 16S rRNA gene  
349 sequence. The Tamura 3-parameter substitution model was used with discrete gamma-distributed  
350 rate variation having 5 categories and a proportion of invariable sites, selected by MEGA5 as  
351 best fitting the data. The percent node conservation >50% in 500 bootstrap replicates is  
352 indicated, and the scale bar indicates the number of substitutions per site. MEGA5's initial  
353 heuristic tree search was applied using an initial neighbor-joining tree of pairwise distances  
354 estimated using the Maximum Composite Likelihood method. <sup>1</sup> - Indicates *X. affinis* origin. <sup>2</sup> -  
355 Indicates *X. saxesenii* origin.

356

357 **Fig. 3 Multilocus phylogeny constructed from 1,364 gene families conserved in all**  
358 ***Streptomyces* genomes analyzed.** Alignments were done using MAFFT and the phylogeny  
359 generated using RAxML. Numbers above the branches based on 100 rapid bootstraps.

360

361 Our work supports a symbiosis between the *S. griseus* XylebKG -1clade and *X. saxesenii*  
362 ambrosia beetles. First, strains were consistently isolated having the same culture morphology  
363 from nests, larvae, and adults, and a random subset of these had 100 % identical 16S rRNA



364 sequences. Second, Actinobacteria were found to be very abundant within the nest material  
365 samples of the investigated *X. saxesenii* strains (approximately 110 *Streptomyces* CFUs per  
366 sample). Their recovery rate of 3.4 *Streptomyces* CFUs per adult individual is comparable with  
367 other established symbioses, like the *Dendroctonus* bark beetle system (average of 7.7  
368 *Streptomyces* CFUs per individual [27]) or mud daubers (maximum average of 3.1 *Streptomyces*  
369 CFUs per individual [33]). Third, *Streptomyces* are vectored by the beetles, likely within their  
370 bodies, as artificial medium was sterile and beetles were surface sterilized before being allowed  
371 to initiate nests. Fourth, the isolation of the XylebKG-1 Actinobacteria 16S phylotype from *X.*  
372 *affinis* further supports an association with ambrosia beetles, and suggests its potentially wider  
373 phylogenetic distribution within these insects.

374

### 375 **Fungal symbionts**

376 Two fungi were consistently isolated from *X. saxesenii* nests. One type was identified as  
377 *Raffaelea sulphurea* using a dichotomous key [71] and confirmed by 18S rRNA and EF- $\alpha$  gene  
378 sequencing. This fungus has been repeatedly isolated from *X. saxesenii* and is known as the main  
379 cultivar of this beetle [4, 9, 71]. The second fungus we isolated was identified as a close relative  
380 of the ascomycetous genus *Nectria* based on 18S rRNA and EF- $\alpha$  gene sequences and both  
381 BLAST and phylogenetic analyses (Fig. 4). The consistent isolation of this *Nectria* sp. suggests  
382 that it is vectored by the ambrosia beetles. *Nectria* species are frequently isolated in low numbers  
383 from Scolytine beetles [72], and unpublished 18S rRNA 454-pyrosequencing data from  
384 Biedermann *et al.* suggest that they are commonly present in the nests of ambrosia beetles. Given  
385 that only *Raffaelea* and *Ambrosiella* species are producing nutritional fruiting structures for

386 feeding ambrosia beetles and *Nectria* spp. are known pathogens of both insects [73] and trees  
387 [74], it is likely a parasite of the system.

388

389 **Fig. 4 Maximum likelihood phylogeny of the fungal antagonist**, highlighted in gray,  
390 constructed using concatenated 18S rRNA and EF- $\alpha$  genes in MEGA5. The Tamura-Nei  
391 substitution model was used with discrete gamma-distributed rate variation having 5 categories  
392 and a proportion of invariable sites, selected by MEGA5 as best fitting the data. The percent  
393 node conservation >50% in 500 bootstrap replicates is indicated, and the scale bar indicates the  
394 number of substitutions per site. MEGA5's initial heuristic tree search was applied using an  
395 initial neighbor-joining tree of pairwise distances estimated using the Maximum Composite  
396 Likelihood method.

397

#### 398 **The potential of *S. griseus* XylebKG-1 as a defensive mutualist**

399 To explore the potential that *S. griseus* XylebKG-1 function as defensive symbionts of *X.*  
400 *saxesenii*, *S. griseus* XylebKG-1's ability to inhibit the growth of *R. sulphurea* and *Nectria* sp.  
401 isolated from this host was examined. Whereas *S. griseus* XylebKG-1 only marginally inhibited  
402 the growth of *R. sulphurea* (average zone of inhibition = 0.52 mm; Fig. 5), it significantly  
403 inhibited the growth of *Nectria* sp. (average zone of inhibition = 26.2 mm; Fig. 5). The strength  
404 of inhibition significantly differed between these fungi (t-test,  $P = 1.03E-27$ ,  $n=29$  and  $n=30$  for  
405 *Nectria* sp. and *R. sulphurea* bioassays, respectively).

406

407 **Fig. 5 Plate bioassays of *S. griseus* XylebKG-1 versus *Nectria* sp. and *R. sulphurea*.** See  
408 methods for assay conditions and media used. Average values are shown from 29 and 30 trials

409 (*Nectria* sp. and *R. sulphurea*, respectively), with error bars representing standard error. T-test  
410 confirmed significance with  $P < 0.01$ .

411

412

### 413 **Secondary metabolites produced by *S. griseus* XylebKG-1**

414 Cultivation in liquid yeast peptone media led to bioactivity guided isolation of cycloheximide (**1**)

415 using *Nectria* sp. as the indicator organism. HR-ESI-MS provided the molecular formula

416  $C_{15}H_{23}NO_4$ ;  $^1H$  and  $^{13}C$  NMR data solely matched to the known compound cycloheximide (**1**). In

417 addition, the isolated metabolite showed the same retention time, UV spectrum and ESI-MS

418 pattern as a commercially acquired cycloheximide standard. Furthermore, cycloheximide was

419 produced by *S. griseus* XylebKG-1 cultivated on agar plates of 8 different media (yeast peptone

420 maltose, potato dextrose, oat, soy mannitol, starch glycerol glucose, ISP1, ISP2, and 1187

421 media), consistent with a robust synthesis of compound cycloheximide under diverse growth

422 conditions. In addition to cycloheximide, two byproducts were isolated by preparative HPLC

423 from a culture of *S. griseus* XylebKG-1 in ISP1 media and identified as naramycin B (**2**) and

424 actiphenol (**3**) [65-67].

425

426 **Fig. 6 Metabolites isolated from *S. griseus* XylebKG-1.** Cycloheximide (**1**); naramycin B (**2**);

427 actiphenol (**3**); dihydromaltophilin (**4**).

428

429 Because the alteration of growth media frequently results in a substantially changed metabolite

430 pattern, a switch in growth media can be utilized to explore the metabolic potential of bacterial

431 strains. In the case of *S. griseus* XylebKG-1, cultivation in PD and ISP4 resulted in the

432 biosynthesis of an additional antifungal metabolite. After isolation by preparative HPLC, the  
433 molecular formula  $C_{29}H_{40}N_2O_6$  (determined by HR-ESI-MS) and NMR data identified the  
434 compound as dihydromaltophilin (**4**) [68].

435  
436 In plate bioassays, cycloheximide inhibited the isolated *Nectria* sp. (zones of inhibition: 30  $\mu$ l, 44  
437 mm; 2  $\mu$ l, 18 mm; 0.2  $\mu$ g, 9 mm) but not *R. sulphurea* (no inhibition observed). Liquid culture  
438 assays confirmed this result, indicating a minimum inhibitory concentration of cycloheximide  
439 towards *Nectria* sp. of 0.02 mM. *R. sulphurea* grew in all test conditions (cycloheximide  
440 concentration up to 2.7 mM), although it did exhibit slower growth at higher concentrations of  
441 cycloheximide (data not shown). Dihydromaltophilin similarly inhibited both *Nectria* sp. and *R.*  
442 *sulphurea* (zones of inhibition: 20  $\mu$ l, 20 / 22 mm; 2  $\mu$ l, 12 / 13 mm). Naramycin-B and  
443 actiphenol were non-inhibitory under all conditions tested.

444  
445 A putative cycloheximide biosynthetic gene cluster was identified in the *S. griseus* XylebKG-1  
446 genome using antiSMASH v2.0 [69] based on its homology to the cycloheximide biosynthetic  
447 cluster from *Streptomyces* sp. YIM56141 (GenBank accession [JX014302.1]) [70], and its being  
448 consistent with retrobiosynthetic logic (data not shown). All proteins predicted in the gene  
449 cluster from *Streptomyces* sp. YIM56141 were present in the *S. griseus* XylebKG-1 genome,  
450 except that the polyketide synthase *cheE* homolog was annotated as two separate genes in *S.*  
451 *griseus* XylebKG-1 (labeled *cheE1* and *cheE2* in Fig. 7). This entire genomic region is conserved  
452 in the genome of *Streptomyces griseus* subsp. *griseus* NBRC13350 [NC\_010572.1]. BLAST  
453 searches using dihydromaltophilin biosynthetic cluster genes previously identified by Yu *et al.*  
454 [75] [EF028635], revealed highly similar protein sequences with the top blast hits of the first six

455 genes (expect values: 0.0, 0.0, 0.0, 0.0, 0.0, and 2e-105) in the cluster being in the same relative  
456 positions. Similar to the pine beetle symbiont *Streptomyces* sp. SPB78 in which no homologs  
457 were found for ferredoxin-like and arginase proteins [76], BLAST indicated top hits for these  
458 genes in separate areas of the genome with much higher expect values (expect values: 8e-009 &  
459 2e-010 respectively). The same pattern of results appeared in a BLAST search of the same  
460 cluster fragment genes against *S. griseus* subsp. *griseus* NRBC13350 [NC\_010572.1]. Namely,  
461 the top BLAST hits for the first six genes had a conserved genomic order and extremely small  
462 expect values (0.0, 0.0, 0.0, 0.0, 0.0, and 2e-105) while the last two genes (ferredoxin-like and  
463 arginase) had much higher expect values (2e-010 & 8e-009) and were found in other parts of the  
464 genome. Evolutionary conservation of these clusters from before the adaptation of *S. griseus*  
465 XylebKG-1 as a symbiont of ambrosia beetles suggests the potential for similar and/or  
466 complementary regulation and activity of the metabolites that they produce.

467

468 **Fig. 7 Putative cycloheximide biosynthetic gene cluster** in *S. griseus* XylebKG-1, predicted  
469 using antiSMASH v2.0, homology to a cycloheximide biosynthetic gene cluster from  
470 *Streptomyces* sp. YIM56141, and retrobiosynthetic logic. Letters above the cluster indicate gene  
471 names, with corresponding locus names and annotations indicated below. An upstream  
472 biosynthetic gene cluster predicted to be unrelated to cycloheximide biosynthesis is also shown,  
473 with its polyketide synthase (PKS) genes indicated.

474

475 Our findings are consistent with *S. griseus* XylebKG-1 being a potential defensive symbiont of  
476 ambrosia beetles. Cycloheximide's specific inhibition of the antagonist *Nectria* sp., but not the  
477 mutualist *R. sulphurea*, supports a defensive role for its production by XylebKG. This parallels

478 similar results obtained for fungus-growing ants and *Dendroctonus frontalis*, where their  
479 associated Actinobacteria inhibited the growth of a fungal parasite and not the fungal mutualist  
480 [26, 27]. Cycloheximide inhibits protein synthesis in eukaryotic cells and as such is toxic to most  
481 eukaryotes [77], including fungi. Interestingly, species in the fungal order Ophiostomatales  
482 (including *Raffaelea* spp.), are known to largely be resistant to cycloheximide [28, 78]. Although  
483 not determined here, *X. affinis* also cultivates a cycloheximide-insensitive *Raffaelea* sp. as food  
484 [47]. Two different ambrosia beetle species associating with two different cycloheximide-  
485 insensitive *Raffaelea* spp. mutualists as well as the cycloheximide-producing *S. griseus*  
486 XylebKG-1 further supports the role of these bacteria as defensive symbionts, as evolutionarily  
487 stable relationships are expected to promote such complementarity. In contrast,  
488 dihydromaltophilin production inhibits the growth of both *Nectria* sp. and *R. sulphurea*. The  
489 production of dihydromaltophilin under only a few growth conditions could suggest that it does  
490 not have an active role in the ambrosia beetle system, but rather is a remnant from before *S.*  
491 *griseus* XylebKG-1 became associated with these beetles. In this regard it is worth noting that  
492 dihydromaltophilin analogs were found at low expression levels in the *Dendroctonus frontalis*  
493 system [76]. Alternatively, dihydromaltophilin production may be regulated to avoid inhibition  
494 of *R. sulphurea*, or selected for activity versus other organisms not considered in this study.

495

## 496 **Conclusion**

497 In this study we consistently isolated a single *Streptomyces* morphotype and phylotype from both  
498 *X. saxesenii* and *X. affinis* that inhibited the growth of the parasitic fungus *Nectria* sp., but not  
499 the mutualistic *R. sulphurea*, likely via the production of cycloheximide. Its ubiquity suggests  
500 that XylebKG-1 may be a defensive mutualist of these ambrosia beetles that inhibits the growth

501 of all but a few fungi, including its mutualistic fungal food source. Future studies should include  
502 natural nests collected from a wider range of species and geographies to establish the breadth and  
503 prevalence of XylebKG-1 in bark and ambrosia beetle nests [28]. These studies should also  
504 include greater phylogenetic power as 16S r RNA gene analyses is not sufficient to resolve  
505 species within the *S. griseus* clade [79]. Cycloheximide should be assayed *in vivo* to confirm the  
506 relevance of its *in vitro* activity, and any other compounds also produced determined *in vivo*  
507 (e.g., those produced by the biosynthetic gene cluster adjacent to the cycloheximide cluster), if  
508 they exist. Furthermore, the presence and activity of XylebKG-1 may also vary during beetle  
509 development, e.g., cycloheximide may be used to clear new nests of contaminating fungus in  
510 preparation for the agricultural symbiont. The antibiosis of cycloheximide includes a large non-  
511 specific range of fungi and as such other fungal symbionts, aside from *Nectria* sp., may also be  
512 inhibited. We have identified a putative defensive Actinobacterium and an antagonistic fungal  
513 symbiont in two ambrosia beetles, potentially expanding the interactions from bipartite to  
514 quadripartite.  
515

516 References

- 517 1. Farrell, B.D., et al., *The evolution of agriculture in beetles (Curculionidae: Scolytinae and*  
518 *Platypodinae)*. *Evolution*, 2001. **55**(10): p. 2011-2027.
- 519 2. Kirkendall, L.R., D.S. Kent, and K.F. Raffa, *Interactions among males, females and offspring in*  
520 *bark and ambrosia beetles: the significance of living in tunnels for the evolution of social*  
521 *behavior*, in *The evolution of social behavior in insects and arachnids*, J.C. Choe and B.J. Crespi,  
522 Editors. 1997, Cambridge University Press: Cambridge, United Kingdom. p. 181-215.
- 523 3. Beaver, R.A., *Insect-fungus relationships in the bark and ambrosia beetles*, in *Insect-fungus*  
524 *interactions*, N. Wilding, et al., Editors. 1989, Academic: London. p. 121-143.
- 525 4. Francke-Grosmann, H., *Zur epizoischen und endozoischen Übertragung der symbiotischen Pilze*  
526 *des Ambrosiakäfers Xyleborus saxeseni (Coleoptera: Scolitidae)*. *Entomologica Germanica*, 1975.  
527 **1**: p. 279-292.
- 528 5. Francke-Grosmann, H., *Hautdrüsen als Träger der Pilzsymbiose bei Ambrosiakäfern*. *Zeitschrift*  
529 *für Morphologie und Ökologie der Tiere*, 1956. **45**(3): p. 275-308.
- 530 6. Kirkendall, L.R., P.H.W. Biedermann, and B.H. Jordal, *Evolution and diversity of bark and*  
531 *ambrosia beetles.*, in *Bark Beetles: Biology and Ecology of Native and Invasive Species*, F.E. Vega  
532 and R.W. Hofstetter, Editors. 2015, Academic Press. p. 85-156.
- 533 7. Batra, L.R., *Ambrosia beetles and their associated fungi: research trends and techniques*.  
534 *Proceedings: Plant Sciences*, 1985. **94**(2-3): p. 137-148.
- 535 8. Mayers, Chase G., et al. "Three genera in the Ceratocystidaceae are the respective symbionts of  
536 three independent lineages of ambrosia beetles with large, complex mycangia." *Fungal*  
537 *Biology* 119.11 (2015): 1075-1092.
- 538 9. Biedermann, P.H.W., et al., *Abundance and dynamics of filamentous fungi in the complex*  
539 *ambrosia gardens of the primitively eusocial beetle Xyleborinus saxesenii Ratzeburg (Coleoptera:*  
540 *Curculionidae, Scolytinae)*. *Fems Microbiology Ecology*, 2013. **83**(3): p. 711-723.
- 541 10. Cassar, S. and M. Blackwell, *Convergent origins of ambrosia fungi*. *Mycologia*, 1996. **88**(4): p.  
542 596-601.
- 543 11. Six, D.L., *Ecological and Evolutionary Determinants of Bark Beetle -Fungus Symbioses*. *Insects*,  
544 2012. **3**(1): p. 339-366.
- 545 12. Aanen, D.K., et al., *The evolution of fungus-growing termites and their mutualistic fungal*  
546 *symbionts*. *Proceedings of the National Academy of Sciences*, 2002. **99**(23): p. 14887-14892.
- 547 13. Mueller, U.G., et al., *The Evolution of Agriculture in Insects*. *Annual Review of Ecology, Evolution,*  
548 *and Systematics*, 2005. **36**(1): p. 563-595.
- 549 14. Mueller, U.G., et al., *The Origin of the Attine Ant-Fungus Mutualism*. *The Quarterly Review of*  
550 *Biology*, 2001. **76**(2): p. 169-197.
- 551 15. Dejean, A., et al., *Arboreal ants build traps to capture prey*. *Nature*, 2005. **434**: p. 973.
- 552 16. Hajek, A.E., et al., *Fidelity Among Sirex Woodwasps and Their Fungal Symbionts*. *Microb Ecol*,  
553 2013. **65**(3): p. 753-762.
- 554 17. Lauth, J., M.X. Ruiz-Gonzalez, and J. Orivel, *New findings in insect fungiculture: Have ants*  
555 *developed non-food, agricultural products?* *Commun Integr Biol*, 2011. **4**(6): p. 728-30.
- 556 18. Leroy, C., et al., *Trophic mediation by a fungus in an ant-plant mutualism*. *Journal of Ecology*,  
557 2011. **99**(2): p. 583-590.
- 558 19. Li, X., W. Guo, and J. Ding, *Mycangial fungus benefits the development of a leaf-rolling weevil,*  
559 *Euops chinesis*. *J Insect Physiol*, 2012. **58**(6): p. 867-73.



- 560 20. Rohfritsch, O., *Plants, gall midges, and fungi: a three-component system*. Entomologia  
561 Experimentalis et Applicata, 2008. **128**(1): p. 208-216.
- 562 21. Toki, W., et al., *Fungal Farming in a Non-Social Beetle*. Plos One, 2012. **7**(7): p. e41893.
- 563 22. Currie, C.R., *Prevalence and impact of a virulent parasite on a tripartite mutualism*. Oecologia,  
564 2001. **128**(1): p. 99-106.
- 565 23. Currie, C.R., U.G. Mueller, and D. Malloch, *The agricultural pathology of ant fungus gardens*.  
566 Proc Natl Acad Sci U S A, 1999. **96**(14): p. 7998-8002.
- 567 24. Cafaro, M.J., et al., *Specificity in the symbiotic association between fungus-growing ants and  
568 protective Pseudonocardia bacteria*. Proc Biol Sci, 2011. **278**(1713): p. 1814-22.
- 569 25. Currie, C.R., et al., *Coevolved Crypts and Exocrine Glands Support Mutualistic Bacteria in Fungus-  
570 Growing Ants*. Science, 2006. **311**(5757): p. 81-83.
- 571 26. Currie, C.R., et al., *Fungus-growing ants use antibiotic-producing bacteria to control garden  
572 parasites*. Nature, 1999. **398**(6729): p. 701-704.
- 573 27. Scott, J.J., et al., *Bacterial protection of beetle-fungus mutualism*. Science, 2008. **322**(5898): p.  
574 63.
- 575 28. Human, Z.R., et al., *Antifungal actinomycetes associated with the pine bark beetle, Orthotomicus  
576 erosus, in South Africa*. South African Journal of Science, 2017. **113**(1-2): p. 34-40.
- 577 29. Visser, A., et al., *Exploring the Potential for Actinobacteria as Defensive Symbionts in Fungus-  
578 Growing Termites*. Microbial Ecology, 2012. **63**(4): p. 975-985.
- 579 30. Ruddick, S.M. and S.T. Williams, *Studies on the ecology of actinomycetes in soil V. Some factors  
580 influencing the dispersal and adsorption of spores in soil*. Soil Biology and Biochemistry, 1972.  
581 **4**(1): p. 93-103.
- 582 31. Kaltenpoth, M., et al., *Symbiotic Bacteria Protect Wasp Larvae from Fungal Infestation*. Current  
583 Biology, 2004. **15**(5): p. 475-479.
- 584 32. Oh, D.C., et al., *Sceliphrolactam, a polyene macrocyclic lactam from a wasp-associated  
585 Streptomyces sp.* Org Lett, 2011. **13**(4): p. 752-5.
- 586 33. Poulsen, M., et al., *Chemical Analyses of Wasp-Associated Streptomyces Bacteria Reveal a  
587 Prolific Potential for Natural Products Discovery*. PLoS One, 2011. **6**(2): p. e16763.
- 588 34. Hanshew, A.S., et al., *Minimization of chloroplast contamination in 16S rRNA gene  
589 pyrosequencing of insect herbivore bacterial communities*. Journal of Microbiological Methods,  
590 2013. **95**(2): p. 149-155.
- 591 35. Seipke, R.F., et al., *Fungus-growing Allomerus ants are associated with antibiotic-producing  
592 actinobacteria*. Antonie van Leeuwenhoek, 2012. **101**(2): p. 443-447.
- 593 36. Seipke, R.F., et al., *Analysis of the bacterial communities associated with two ant-plant  
594 symbioses*. MicrobiologyOpen, 2013.
- 595 37. Florez, L.V., et al., *Defensive symbioses of animals with prokaryotic and eukaryotic  
596 microorganisms*. Nat Prod Rep, 2015. **32**(7): p. 904-36.
- 597 38. Berdy, J., *Bioactive microbial metabolites*. J Antibiot (Tokyo), 2005. **58**(1): p. 1-26.
- 598 39. Sekar, R., et al., *An Improved Protocol for Quantification of Freshwater Actinobacteria by  
599 Fluorescence In Situ Hybridization*. Applied and Environmental Microbiology, 2003. **69**(5): p.  
600 2928-2935.
- 601 40. Stach, E. and A.T. Bull, *Estimating and comparing the diversity of marine actinobacteria*. Antonie  
602 van Leeuwenhoek, 2005. **87**(1): p. 3-9.
- 603 41. Wood, S.L., *The bark and ambrosia beetles of North and Central America (Coleoptera:  
604 Scolytidae), a taxonomic monograph*. Great Basin Naturalist Memoirs, 1982. **6**: p. 1-1359.

- 605 42. Schedl, K.E., *Scolytidae und Platypodidae Afrikas, II*. Revista de Entomologia de Mocambique,  
606 1962. **5**(1): p. 1-594.
- 607 43. Biedermann, P., K. Peer, and M. Taborsky, *Female dispersal and reproduction in the ambrosia*  
608 *beetle Xyleborinus saxesenii Ratzeburg (Coleoptera; Scolytinae)*. Vol. 18. 2012. 231-235.
- 609 44. Biedermann, P.H.W., K.D. Klepzig, and M. Taborsky, *Fungus cultivation by ambrosia beetles:*  
610 *Behavior and laboratory breeding success in three xyleborine species*. Environmental  
611 entomology, 2009. **38**(4): p. 1096-1105.
- 612 45. Biedermann, P.H.W., K.D. Klepzig, and M. Taborsky, *Costs of delayed dispersal and alloparental*  
613 *care in the fungus-cultivating ambrosia beetle Xyleborus affinis Eichhoff (Scolytinae:*  
614 *Curculionidae) Behavioral Ecology and Sociobiology 65:1753-1761 11 p*. Behavioral Ecology and  
615 Sociobiology, 2011(65): p. 1753-1761.
- 616 46. Biedermann, P.H.W. and M. Taborsky, *Larval helpers and age polyethism in ambrosia beetles*.  
617 Proc.Natl Acad.Sci.USA, 2011. **108**(41): p. 17064-17069.
- 618 47. Roeper, R.A. and J.R.J. French, *Ambrosia fungi of the Western United States and Canada - beetle*  
619 *associations (Coleoptera: Scolytidae), Tree Hosts, and Distribution*. Northwest Science, 1981.  
620 **55**(4): p. 305-309.
- 621 48. Grubbs, K.J., et al., *Genome sequence of Streptomyces griseus strain XylebKG-1, an ambrosia*  
622 *beetle-associated actinomycete*. Journal of bacteriology, 2011. **193**(11): p. 2890-2891.
- 623 49. Peer, K. and M. Taborsky, *Female ambrosia beetles adjust their offspring sex ratio according to*  
624 *outbreeding opportunities for their sons*. Journal of evolutionary biology, 2004. **17**(2): p. 257-  
625 264.
- 626 50. Cafaro, M.J. and C.R. Currie, *Phylogenetic analysis of mutualistic filamentous bacteria associated*  
627 *with fungus-growing ants*. Canadian Journal of Microbiology, 2005. **51**(6): p. 441-446.
- 628 51. White, T., et al., *Amplification and direct sequencing of fungal ribosomal RNA genes for*  
629 *phylogenetics*, in *PCR Protocols: A Guide to Methods and Applications*, M. Innis, et al., Editors.  
630 1990, Academic Press. p. 315-322.
- 631 52. Rehner, S.A. and E. Buckley, *A Beauveria phylogeny inferred from nuclear ITS and EF1- $\alpha$*   
632 *sequences: evidence for cryptic diversification and links to Cordyceps teleomorphs*. Mycologia,  
633 2005. **97**(1): p. 84-98.
- 634 53. Heuer, H., et al., *Analysis of actinomycete communities by specific amplification of genes*  
635 *encoding 16S rRNA and gel-electrophoretic separation in denaturing gradients*. Applied and  
636 Environmental Microbiology, 1997. **63**(8): p. 3233-3241.
- 637 54. Edwards, U., et al., *Isolation and direct complete nucleotide determination of entire genes.*  
638 *Characterization of a gene coding for 16S ribosomal RNA*. Nucleic Acids Research, 1989. **17**(19):  
639 p. 7843-7853.
- 640 55. Benson, D.A., et al., *GenBank*. Nucleic Acids Research, 2013. **41**(D1): p. D36-D42.
- 641 56. Altschul, S.F., et al., *Basic local alignment search tool*. Journal of molecular biology, 1990. **215**(3):  
642 p. 403-410.
- 643 57. Tamura, K., et al., *MEGA5: molecular evolutionary genetics analysis using maximum likelihood,*  
644 *evolutionary distance, and maximum parsimony methods*. Molecular biology and evolution,  
645 2011. **28**(10): p. 2731-2739.
- 646 58. Edgar, R.C., *MUSCLE: multiple sequence alignment with high accuracy and high throughput*.  
647 Nucleic Acids Research, 2004. **32**(5): p. 1792-1797.
- 648 59. Hyatt, D., et al., *Prodigal: prokaryotic gene recognition and translation initiation site*  
649 *identification*. BMC Bioinformatics, 2010. **11**: p. 119.

- 650 60. Finn, R.D., J. Clements, and S.R. Eddy, *HMMER web server: interactive sequence similarity*  
651 *searching*. Nucleic Acids Research, 2011. **39**(suppl 2): p. W29-W37.
- 652 61. Kanehisa, M. and S. Goto, *KEGG: kyoto encyclopedia of genes and genomes*. Nucleic Acids  
653 Research, 2000. **28**(1): p. 27-30.
- 654 62. Katoh, K. and D.M. Standley, *MAFFT multiple sequence alignment software version 7:*  
655 *improvements in performance and usability*. Mol Biol Evol, 2013. **30**(4): p. 772-780.
- 656 63. Stamatakis, A., *RAXML-VI-HPC: maximum likelihood-based phylogenetic analyses with thousands*  
657 *of taxa and mixed models*. Bioinformatics, 2006. **22**(21): p. 2688-2690.
- 658 64. Darling, A.E., B. Mau, and N.T. Perna, *progressiveMauve: Multiple Genome Alignment with Gene*  
659 *Gain, Loss and Rearrangement*. Plos One, 2010. **5**(6): p. e11147.
- 660 65. Jeffs, P.W. and D. McWilliams, *Carbon-13 nuclear magnetic resonance study of the biosynthesis*  
661 *of cycloheximide. Stereospecific incorporation of malonate into the glutarimide ring*. Journal of  
662 the American Chemical Society, 1981. **103**(20): p. 6185-6192.
- 663 66. Lakhvich, F., T. Buravskaya, and A. Akhrem, *Synthesis of actiphenol and its normethyl analogues*  
664 *and 6-hydroxy derivatives*. Chemistry of Natural Compounds, 1993. **29**(4): p. 526-529.
- 665 67. Berg, D., et al., *Naramycin B, an antibiotic from Streptomyces griseus strain 587 with herbicidal*  
666 *properties-fermentation, isolation, and identification*. Z. Naturforsch., 1982. **37**(11/12): p. 1100-  
667 1106.
- 668 68. Graupner, P.R., et al., *Dihydromaltophilin; a novel fungicidal tetramic acid containing metabolite*  
669 *from Streptomyces sp.* J Antibiot (Tokyo), 1997. **50**(12): p. 1014-1019.
- 670 69. Blin, K., et al., *antiSMASH 2.0—a versatile platform for genome mining of secondary metabolite*  
671 *producers*. Nucleic Acids Research, 2013.
- 672 70. Yin, M., et al., *Cycloheximide and Actiphenol Production in Streptomyces sp. YIM56141 Governed*  
673 *by Single Biosynthetic Machinery Featuring an Acyltransferase-less Type I Polyketide Synthase*.  
674 Organic Letters, 2014. **16**(11): p. 3072-3075.
- 675 71. Batra, L.R., *Ambrosia fungi: a taxonomic revision, and nutritional studies of some species*.  
676 Mycologia, 1967. **59**(6): p. 976-1017.
- 677 72. Persson, Y., et al., *Fungi vectored by the bark beetle Ips typographus following hibernation under*  
678 *the bark of standing trees and in the forest litter*. Microbial Ecology, 2009. **58**(3): p. 651-659.
- 679 73. Mauchline, N., et al., *Process of infection of armored scale insects (Diaspididae) by an*  
680 *entomopathogenic Cosmospora sp.* Journal of Invertebrate Pathology, 2011. **108**(1): p. 46-51.
- 681 74. Ehrlich, J., *The beech bark disease: a Nectria disease of Fagus, following Cryptococcus fagi*  
682 *(Baer.)*. Canadian Journal of Research, 1934. **10**(6): p. 593-692.
- 683 75. Yu, F., et al., *Structure and Biosynthesis of Heat-Stable Antifungal Factor (HSAF), a Broad-*  
684 *Spectrum Antimycotic with a Novel Mode of Action*. Antimicrobial Agents and Chemotherapy,  
685 2007. **51**(1): p. 64-72.
- 686 76. Blodgett, J.A.V., et al., *Common biosynthetic origins for polycyclic tetramate macrolactams from*  
687 *phylogenetically diverse bacteria*. Proceedings of the National Academy of Sciences, 2010.  
688 **107**(26): p. 11692-11697.
- 689 77. Obrig, T.G., et al., *The Mechanism by which Cycloheximide and Related Glutarimide Antibiotics*  
690 *Inhibit Peptide Synthesis on Reticulocyte Ribosomes*. Journal of Biological Chemistry, 1971.  
691 **246**(1): p. 174-181.
- 692 78. Harrington, T.C., *Cycloheximide Sensitivity as a Taxonomic Character in Ceratocystis*. Mycologia,  
693 1981. **73**(6): p. 1123-1129.

694 79. Rong, X. and Y. Huang, *Taxonomic evaluation of the Streptomyces griseus clade using multilocus*  
695 *sequence analysis and DNA–DNA hybridization, with proposal to combine 29 species and three*  
696 *subspecies as 11 genomic species*. Int J Syst Evol Microbiol, 2010. **60**(3): p. 696-703.

697

698

**Table 1. Number of plates yielding actinobacterial growth.**

Two samples were collected from each nest and plated in duplicate.

| <i>Xyleborinus saxesenii</i> | Adults | Larvae | Nest  | Substrate |
|------------------------------|--------|--------|-------|-----------|
| Nest 1                       | 6/6    | 2/6    | 6/6   |           |
| Nest 2                       | 3/6    | 3/6    | 2/6   |           |
| Nest 3                       | 4/6    | 1/6    | 3/6   |           |
| Control                      |        |        |       | 0/6       |
| Total                        | 13/18  | 6/18   | 11/18 | 0/6       |

699

700 **S1 Methods. Additional details concerning analytical chemistry methods.**

701 **S2 Fig1. Updated Maximum likelihood 16S phylogeny of the XylebKG-1 clade and its**  
702 **relatives**

703 **S3 Fig2. <sup>1</sup>H spectrum of cycloheximide (CD<sub>3</sub>OD).**

704 **S4 Fig3. <sup>1</sup>H spectrum of naramycin B (CD<sub>3</sub>OD)**

705 **S5 Fig4. <sup>1</sup>H spectrum of dihydromaltophilin (CD<sub>3</sub>OD)**

Figure 1

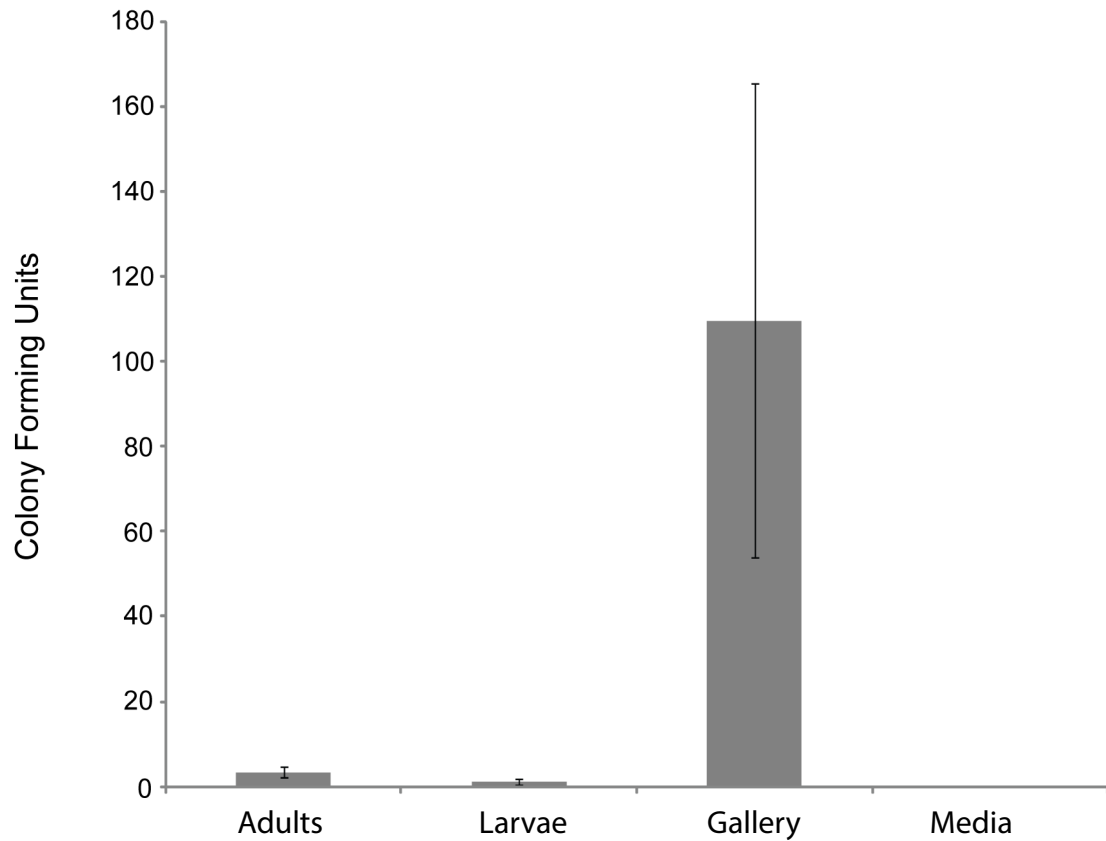

## Figure 2

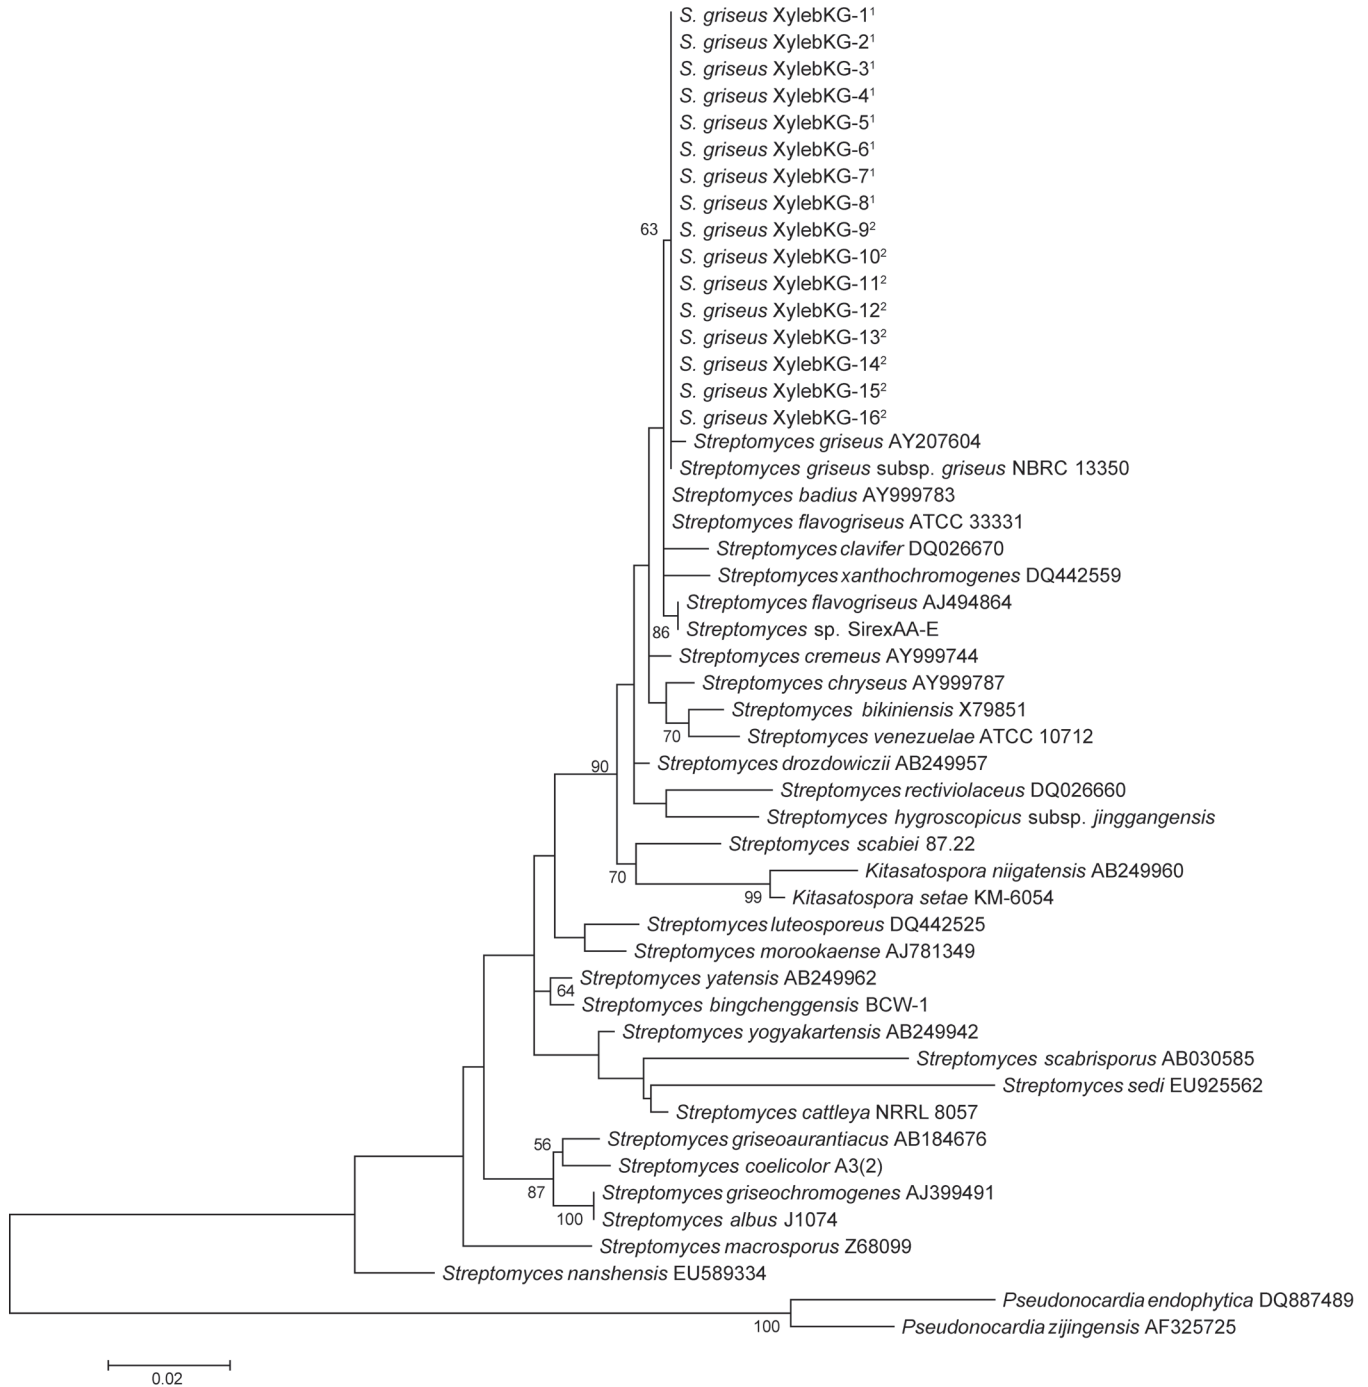

## Figure 3

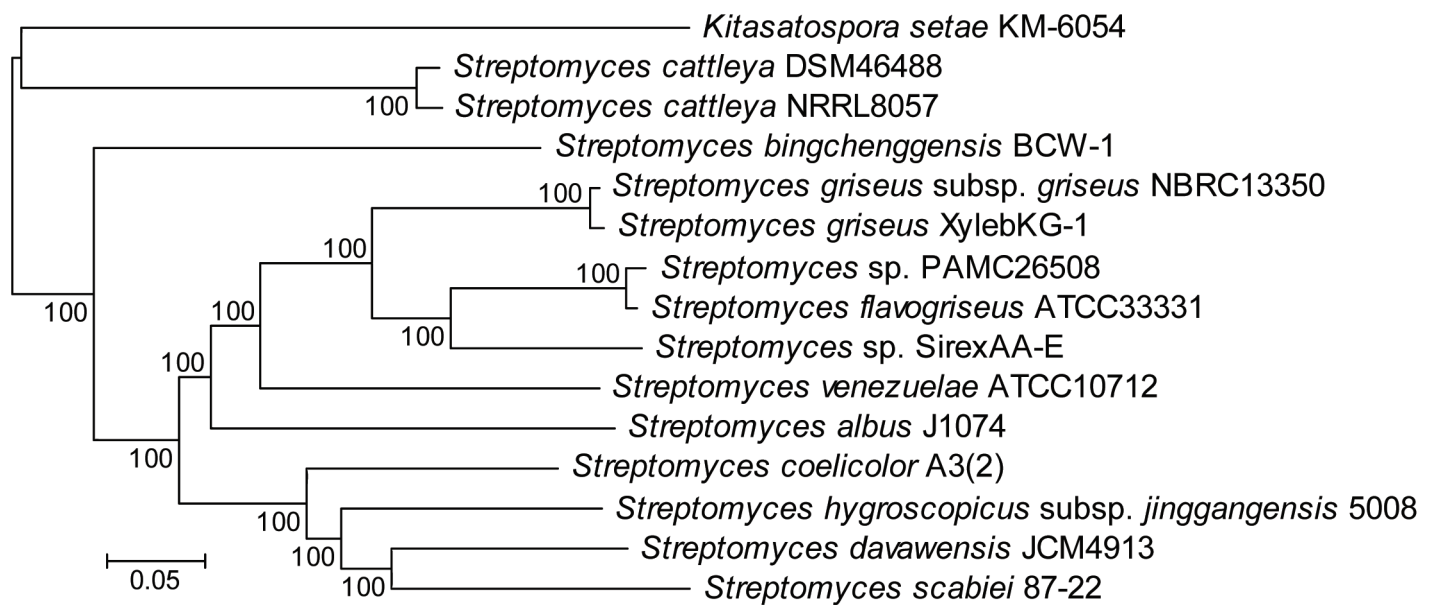



## Figure 4

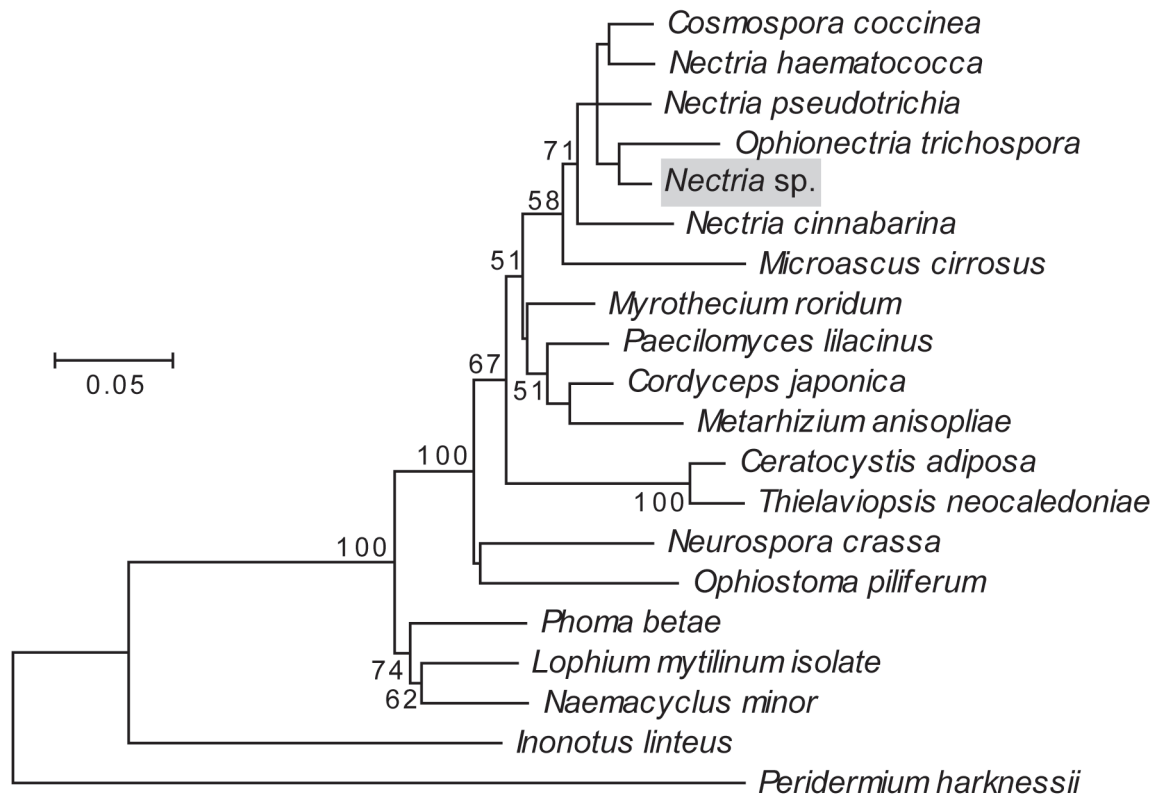



Figure 5

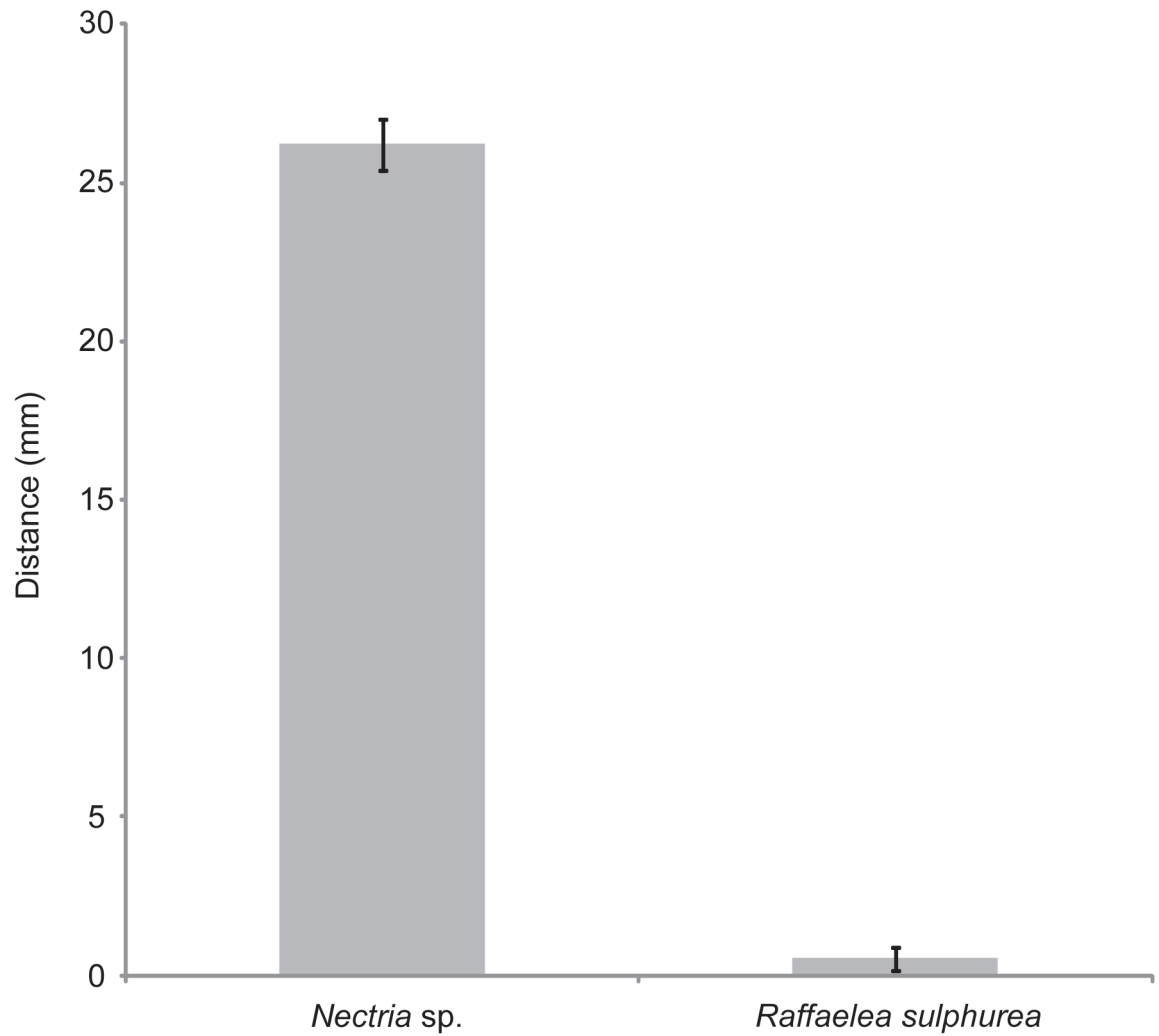

Figure 6

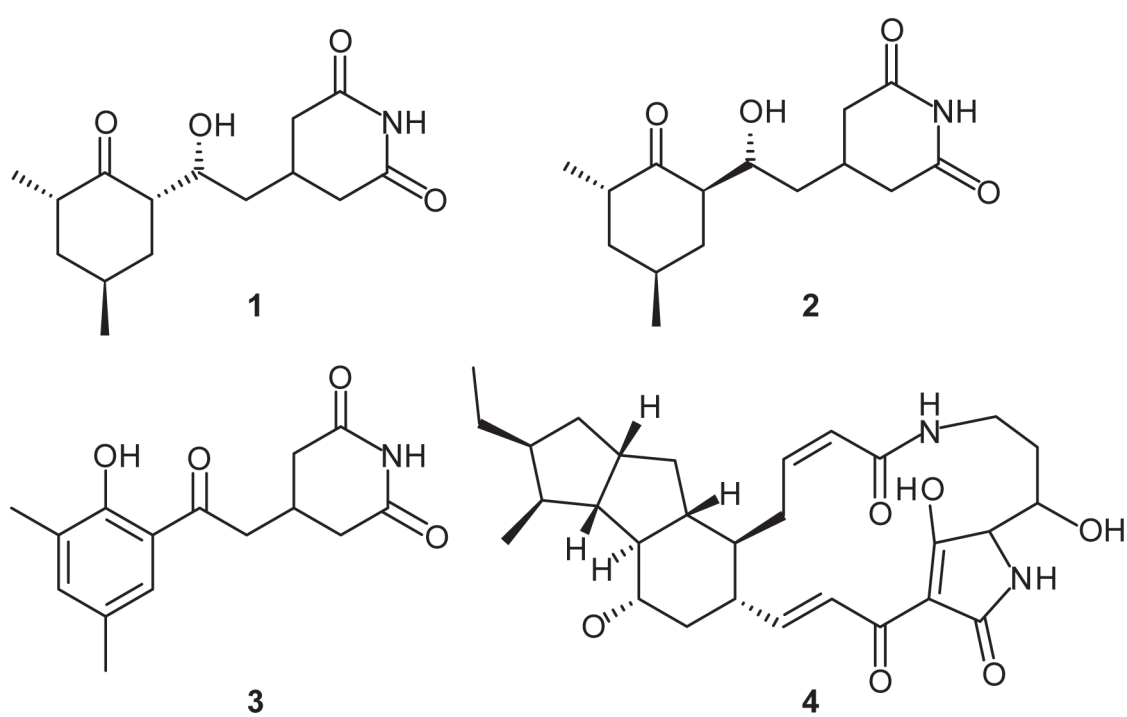

Figure 7

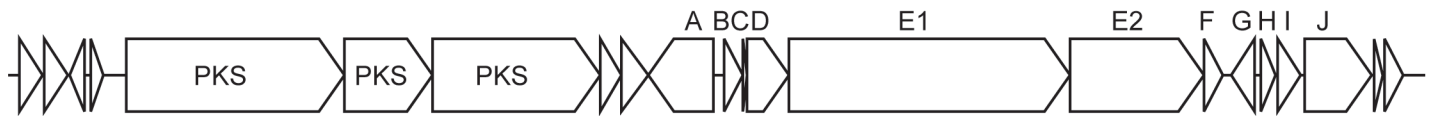

chxA: SACT1\_7137 - SARP-type transcriptional regulator

chxB: SACT1\_7138 - Acyl transferase

chxC: SACT1\_7139 - Acyl carrier protein

chxD: SACT1\_7140 - Asparagine transferase

chxE1: SACT1\_7141 - trans-AT polyketide synthase

chxE2: SACT1\_7142 - trans-AT polyketide synthase

chxF: SACT1\_7143 - LysR-type transcriptional regulator

chxG: SACT1\_7144 - NADH:flavin oxidoreductase

chxH: SACT1\_7145 - Short chain dehydrogenase

chxI: SACT1\_7146 - Cytochrome P450

chxJ: SACT1\_7147 - AMP-dependent synthetase and ligase
